# Supplementary material for: The influence of frequency and gravity on the orientation of active metallo-dielectric Janus particles translating under a uniform applied alternating-current electric field
Source: Royal Society of Chemistry journal article supplement (doi:10.1039/d3sm01640d), 2024-01-01
Supplement: d3sm01640d3.pdf [file d3sm01640d3.pdf]

Supplementary Videos

Supplementary Video 1: Janus particle translating under 10Vpp at 1kHz

Supplementary Video 2: Janus particle translating under 10Vpp at 100kHz
